# Supplementary material for: Epstein-Barr virus mir-bart1-5p detection via nasopharyngeal brush sampling is effective for diagnosing nasopharyngeal carcinoma
Source: PubMed Central journal article supplement (PMC4826258; doi:10.18632/oncotarget.6649), 2015-12-18
Supplement: oncotarget-07-4972-s001.pdf [file oncotarget-07-4972-s001.pdf]

## SUPPLEMENTARY FIGURES AND TABLES

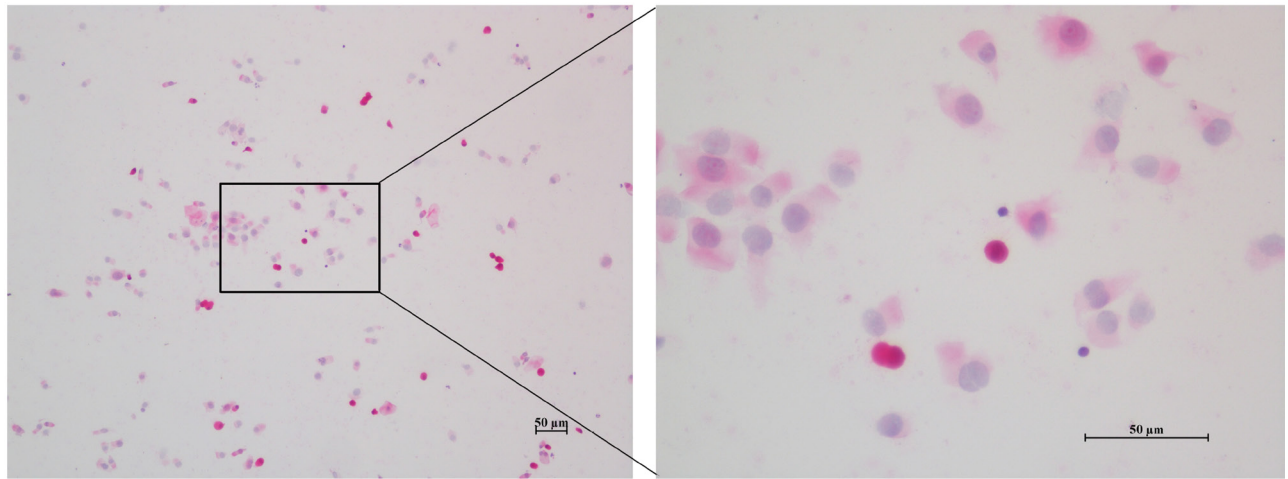

**Supplementary Figure S1: A typical NP brush smear was conducted.** This result showed NP brush sampling could collect shedding cells from NP tissue, including tumor cells.

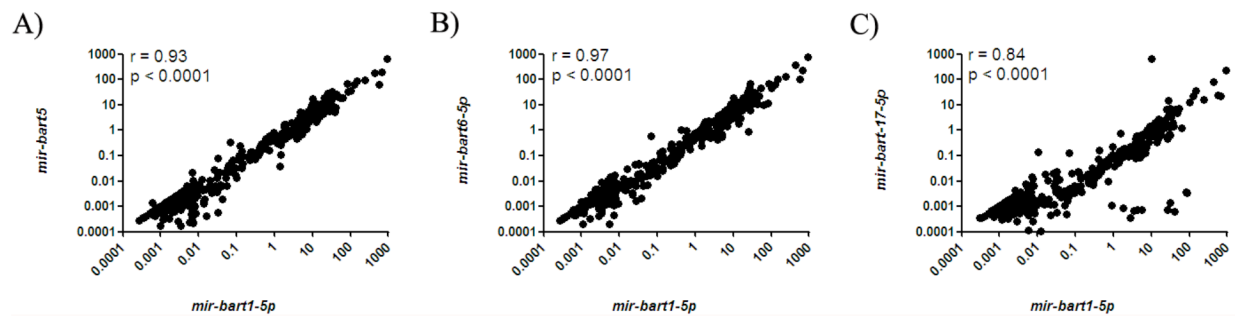

**Supplementary Figure S2: Significant correlations among the four EBV miRNAs were observed.** The correlation coefficients of *mir-bart1-5p* with *mir-bart5* **A.** *mir-bart6-5p* **B.** and *mir-bart17-5p* **C.** were 0.93, 0.97 and 0.84, respectively (all with  $p < 0.0001$ ).

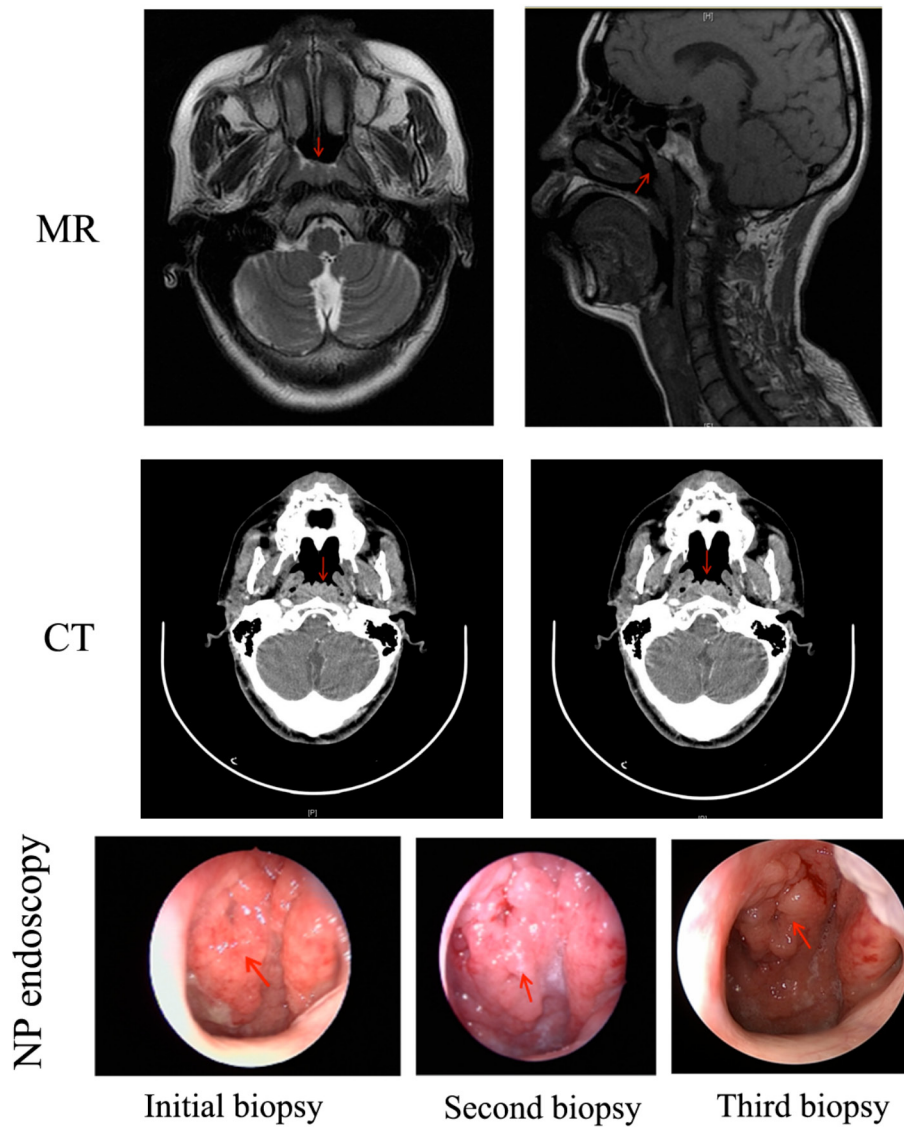

Supplementary Figure S3: CT and MR results, along with endoscopy images, are shown for a representative patient.

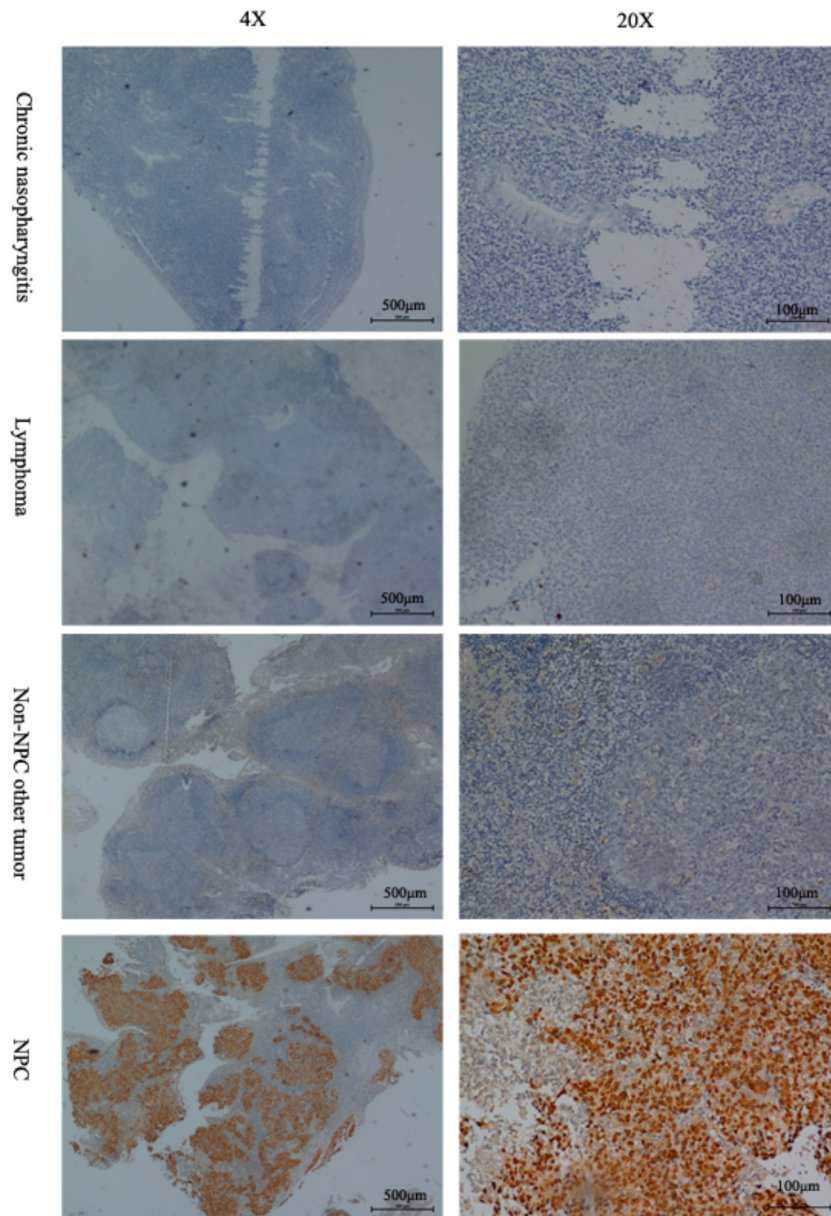

**Supplementary Figure S4: Representative results of EBERs *in situ* hybridization using NP tissue slices from different participants. High EBERs signal was only observed in the tissue slices from NPC patients.**

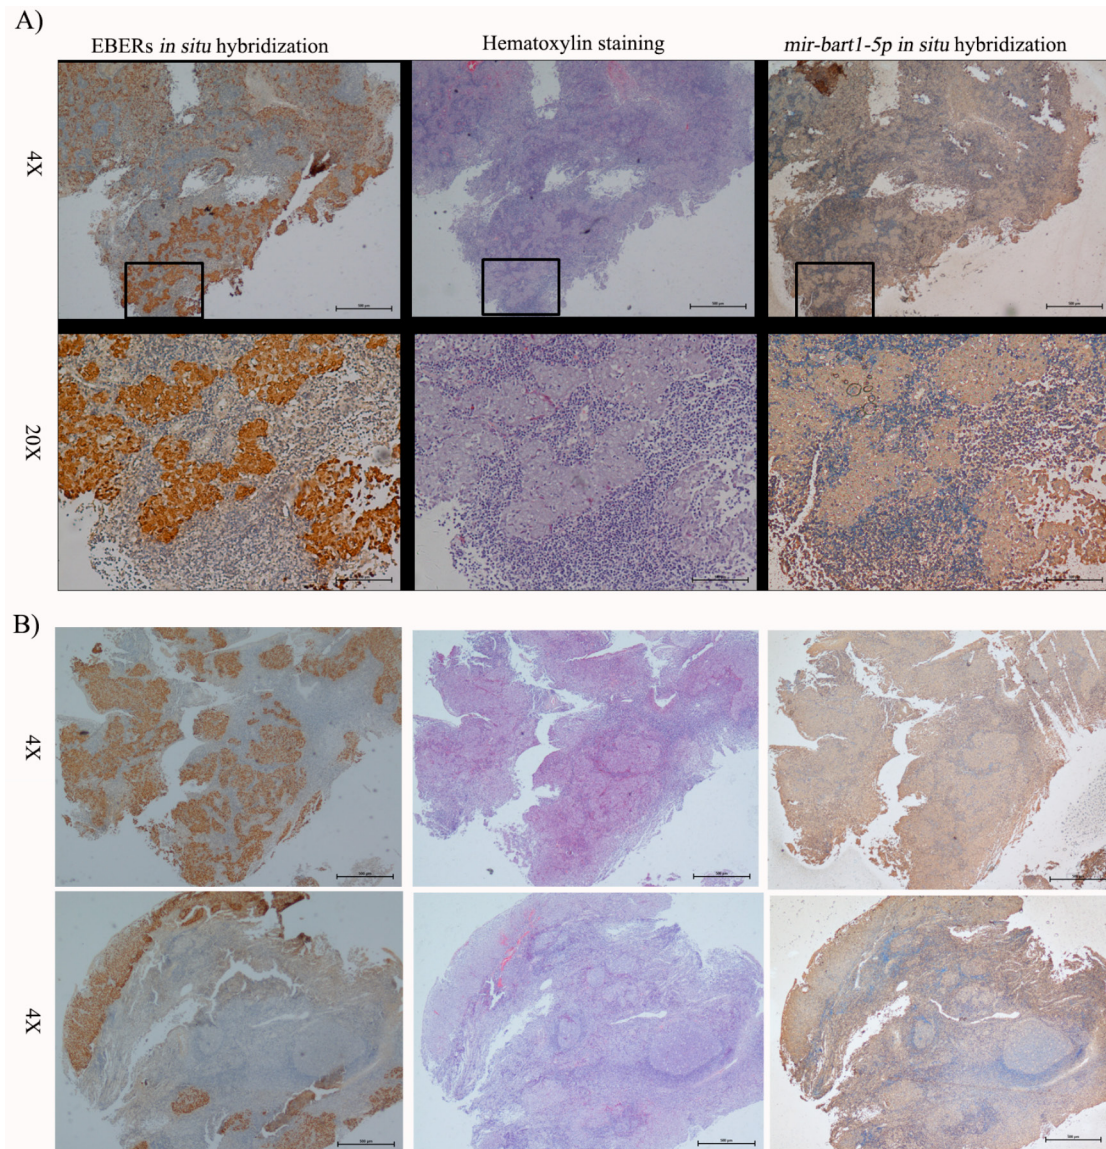

**Supplementary Figure S5: Representative results of EBERs and *mir-bart1-5p* *in situ* hybridization using NP tissue slices with negative *mir-bart1-5p* expression in NP brush samples.** The results showed *mir-bart1-5p* and EBERs were both expressed in nasopharyngeal tumor cells **A**. Two representative samples with negative *mir-bart1-5p* expression in NP brush samples **B**.

Supplementary Table S1: The relative expression of EBV miRNAs in tissue samples

| EBV miRNAs           | Group    | Median | Minimum | Maximum | Mann-Whitney test |
|----------------------|----------|--------|---------|---------|-------------------|
| <i>mir-bart1-5p</i>  | NPC      | 68     | 0.2     | 710     | P < 0.001         |
|                      | Controls | 0.002  | 0.00033 | 0.041   |                   |
| <i>mir-bart5</i>     | NPC      | 11     | 0.033   | 72      | P < 0.001         |
|                      | Controls | 0.001  | 0.00032 | 0.0093  |                   |
| <i>mir-bart6-5p</i>  | NPC      | 33     | 0.058   | 150     | P < 0.001         |
|                      | Controls | 0.003  | 0.00034 | 0.044   |                   |
| <i>mir-bart17-5p</i> | NPC      | 4.1    | 0.00038 | 59      | P < 0.001         |
|                      | Controls | 0.001  | 0.00032 | 0.0083  |                   |

Supplementary Table S2: The relative expression of EBV miRNAs in NP brush samples

| EBV miRNAs           | Group    | Median | Minimum | Maximum | Mann-Whitney test |
|----------------------|----------|--------|---------|---------|-------------------|
| <i>mir-bart1-5p</i>  | NPC      | 2.05   | 0.00087 | 920     | P < 0.001         |
|                      | Controls | 0.002  | 0       | 0.040   |                   |
| <i>mir-bart5</i>     | NPC      | 0.84   | 0.00031 | 660     | P < 0.001         |
|                      | Controls | 0.001  | 0       | 0.022   |                   |
| <i>mir-bart6-5p</i>  | NPC      | 1.08   | 0.00054 | 770     | P < 0.001         |
|                      | Controls | 0.002  | 0       | 0.021   |                   |
| <i>mir-bart17-5p</i> | NPC      | 0.12   | 0.00031 | 650     | P < 0.001         |
|                      | Controls | 0.001  | 0       | 0.018   |                   |

Supplementary Table S3: Diagnosis of NPC by repeated pathological biopsy and *mir-bart1-5p* expression

| Sample ID | <i>mir-bart1-5p</i> expression | Number of biopsies |
|-----------|--------------------------------|--------------------|
| 50        | 0.96                           | 2                  |
| 62        | 8.64                           | 2                  |
| 66        | 0.05                           | 2                  |
| 78        | 1.83                           | 3                  |
| 81        | 3.42                           | 2                  |
| 88        | 0.23                           | 2                  |
| 107       | 0.23                           | 2                  |
| 125       | 0.05                           | 2                  |
| 154       | 0.08                           | 2                  |
| 172       | 1.56                           | 2                  |
| 181       | 3.12                           | 2                  |
| 209       | 0.26                           | 2                  |
| 222       | 0.74                           | 5                  |
| 228       | 0.39                           | 2                  |
| 260       | 0.06                           | 4                  |
| 268       | 6.86                           | 2                  |

Repeated biopsy sampling was conducted in 16 patients before obtaining a correct pathological diagnosis. Levels of EBV *mir-bart1-5p* in NP brush samples from these patients were all above the COV.
